# Supplementary material for: Seeking neutral: A VR-based person-identity-matching task for attentional bias modification – A randomised controlled experiment
Source: PubMed Central journal article supplement (PMC7452567; doi:10.1016/j.invent.2020.100334), 2020-08-14
Supplement: mmc2.pdf [file mmc2.pdf]

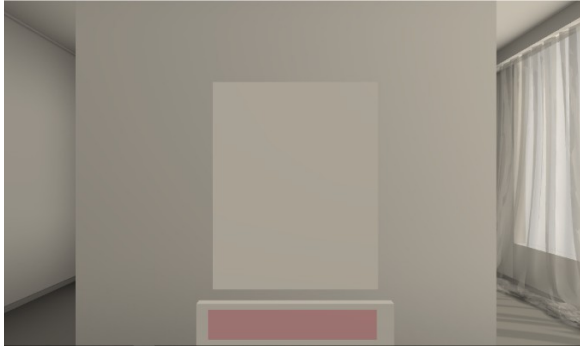

(a) VR environment

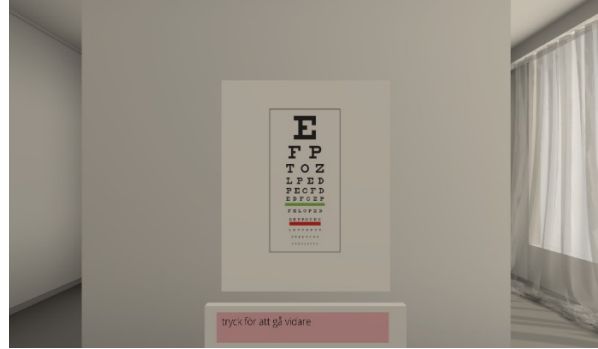

(b) Snellen chart for visual acuity check

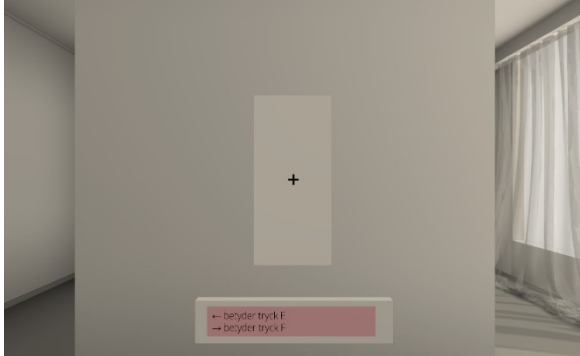

(c) Fixation cross

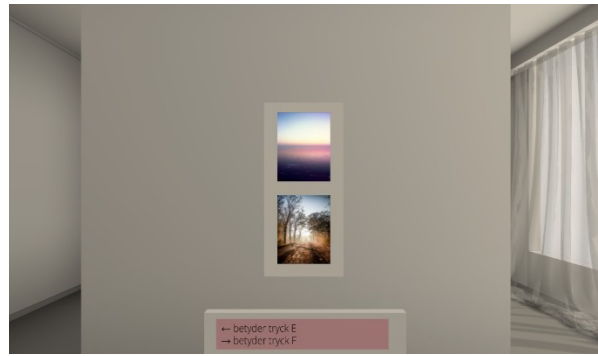

(d) Stimuli presentation

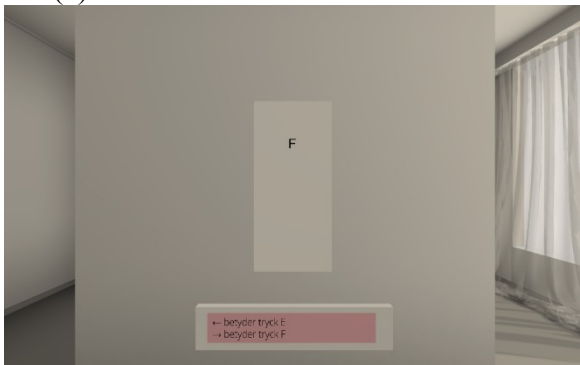

(e) Probe presentation

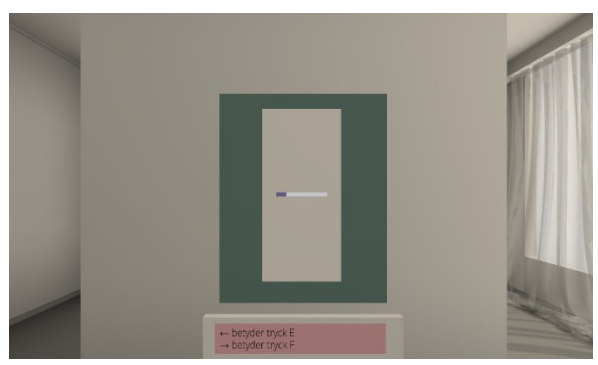

(f) Response feedback (tutorial only)
